# Supplementary material
Source: Springer Nature journal article supplement (https://www.springermedizin.de/resource/supplementary/12943_2011_1009_MOESM3_ESM.pdf/9552100)
Supplement: MOESM3 [file 9552100]

GBM12

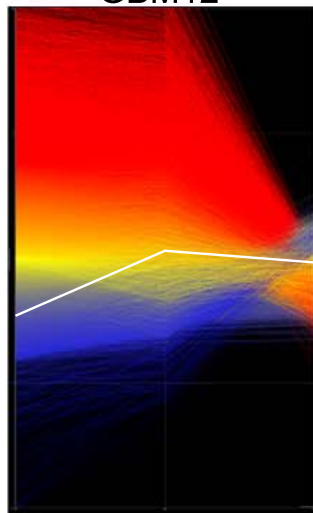

Core Edge Normal

GBM14

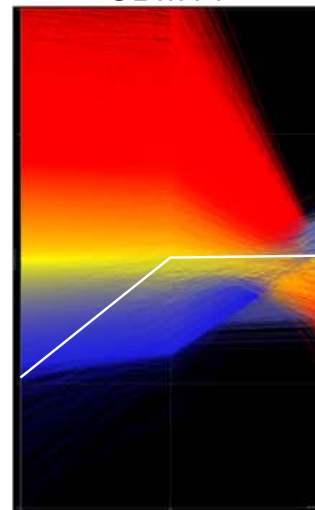

Core Edge Normal

GBM6

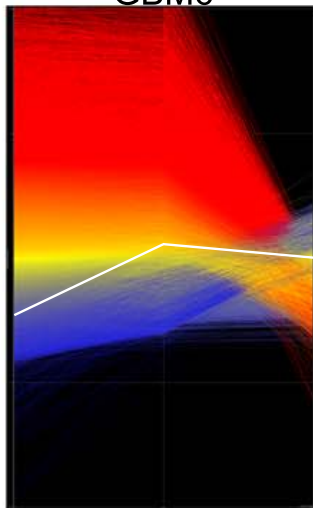

Core Edge Normal

# Total Galectin-1 Profile

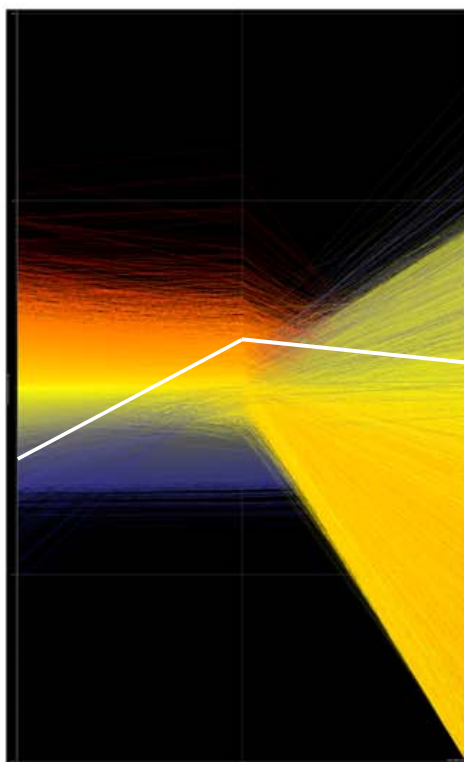

Core Edge Normal

GBM36

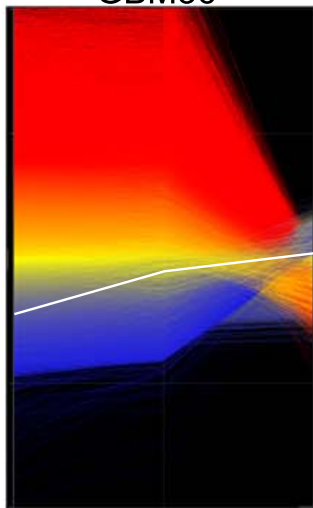

Core Edge Normal

GBM39

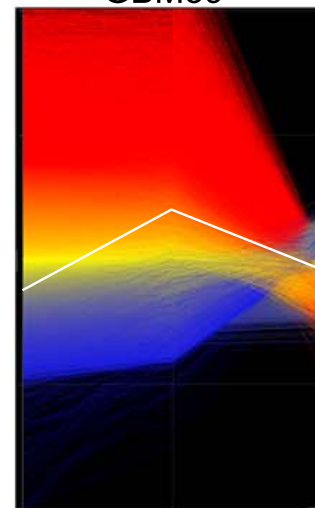

Core Edge Normal

GBM38

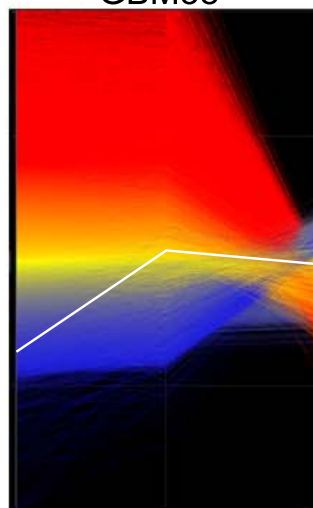

Core Edge Normal
